# Supplementary material for: Changes in diversity and composition of rhizosphere bacterial community during natural restoration stages in antimony mine
Source: PeerJ. 2021 Oct 14;9:e12302. doi: 10.7717/peerj.12302 (PMC8520691; doi:10.7717/peerj.12302)
Supplement: Supplemental Information 5 [file peerj-09-12302-s005.xls]

## Sheet: Sheet1
				Restoration stage	Sb (mg/kg)	As (mg/kg)	Cd (mg/kg)	Pb (mg/kg)	Zn (mg/kg)	Hg (mg/kg)
				ER	5959.00±702.20 a	78.84±11.55 a	17.38±3.03 a	266.00±62.95 a	722.00±58.31 a	3.00±1.38 a
				MR	839.00±89.87 b	38.55±6.24 b	1.27±0.44 b	54.00±8.28 b	115.00±12.93 b	0.75±0.11 b
				LR	68.70±1.49 c	10.69±1.35 c	0.78±0.14 c	16.60±3.70 c	108.00±8.01 b	0.18±0.05 b
					Sb (mg/kg)	As (mg/kg)	Cd (mg/kg)	Pb (mg/kg)	Zn (mg/kg)	Hg (mg/kg)
5959	29795			1	6020	81	17.55	256	700	2.66
839	4195			1	5856	74.6	20.65	288	756	3.58
687	3435			1	6253	88.3	15.69	235	724	3.62
				1	5924	77.8	18.66	268	736	2.58
				1	5742	72.5	14.35	283	694	2.56
				2	813	39.64	1.05	56	123	0.64
				2	906	40.36	1.15	50	119	0.85
				2	842	35.84	1.36	58	106	0.69
				2	808	37.49	1.44	53	108	0.74
				2	826	39.42	1.35	53	119	0.83
				3	65.9	11.55	0.7	16	101	0.11
				3	66.6	10.58	0.75	18	96	0.2
				3	75.6	9.69	0.77	15	109	0.19
				3	67.5	11.69	0.85	19	115	0.22			0.83
				3	67.9	9.94	0.83	15	119	0.18

## Sheet: Sheet2
Restoration stage	Sb (mg/kg)	As (mg/kg)	Cd (mg/kg)	Pb (mg/kg)	Zn (mg/kg)	Hg (mg/kg)
ER	6020	81	17.55	256	700	2.66
ER	5856	74.6	20.65	288	756	3.58
ER	6253	88.3	15.69	235	724	3.62
ER	5924	77.8	18.66	268	736	2.58
ER	5742	72.5	14.35	283	694	2.56
MR	813	39.64	1.05	56	123	0.64
MR	906	40.36	1.15	50	119	0.85
MR	842	35.84	1.36	58	106	0.69
MR	808	37.49	1.44	53	108	0.74
MR	826	39.42	1.35	53	119	0.83
LR	65.9	11.55	0.7	16	101	0.11
LR	66.6	10.58	0.75	18	96	0.2
LR	75.6	9.69	0.77	15	109	0.19
LR	67.5	11.69	0.85	19	115	0.22
LR	67.9	9.94	0.83	15	119	0.18
